# Supplementary material
Source: PubMed Central journal article supplement (PMC4271530)

## *Apios americana*

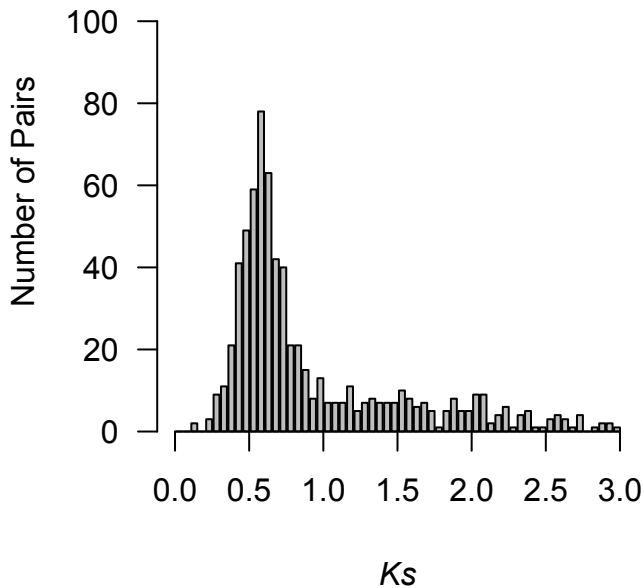

## Arachis Hypogaea

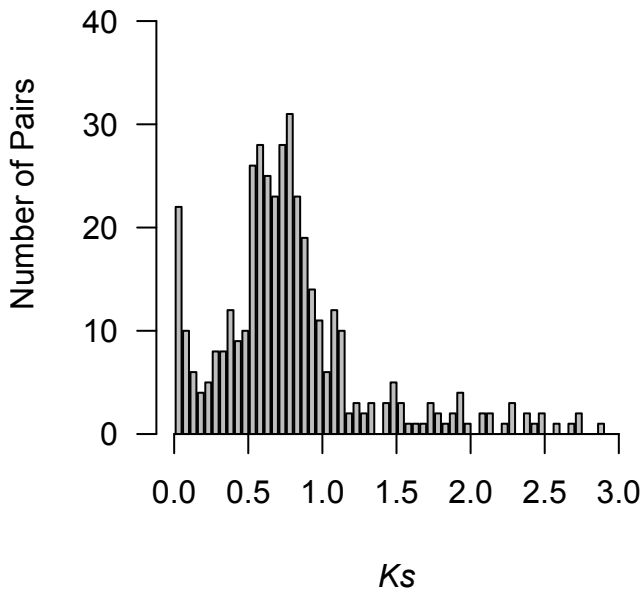

## Lupinus polyphyllus

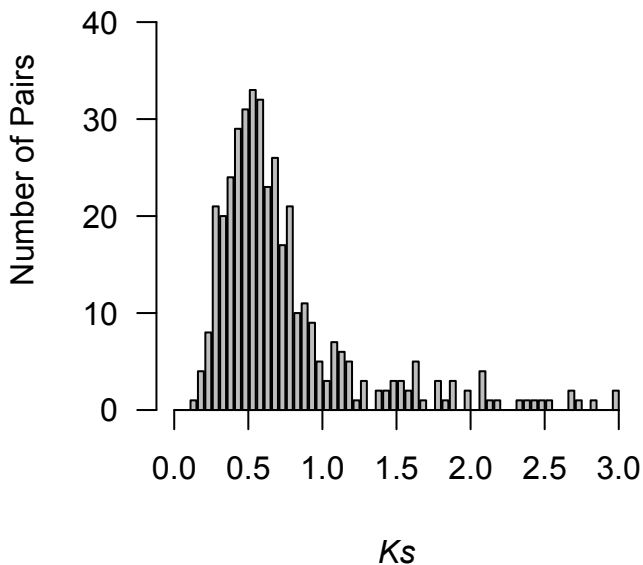

# ***Chamaecrista fasciculata***

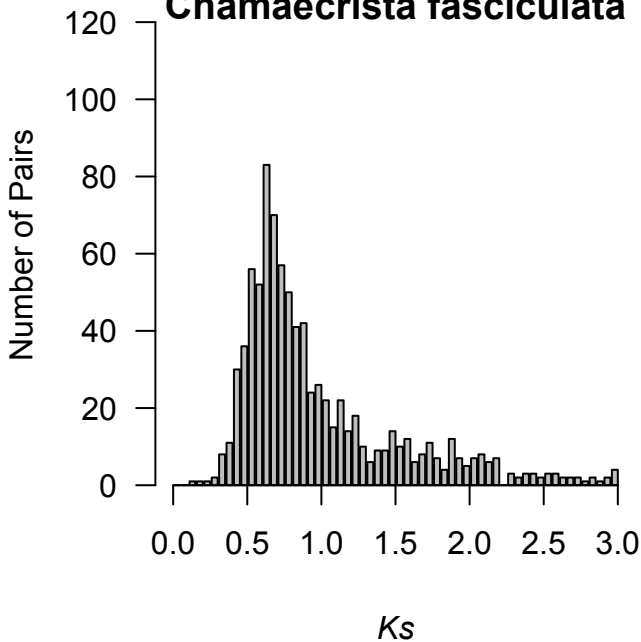

# Gleditsia triacanthos

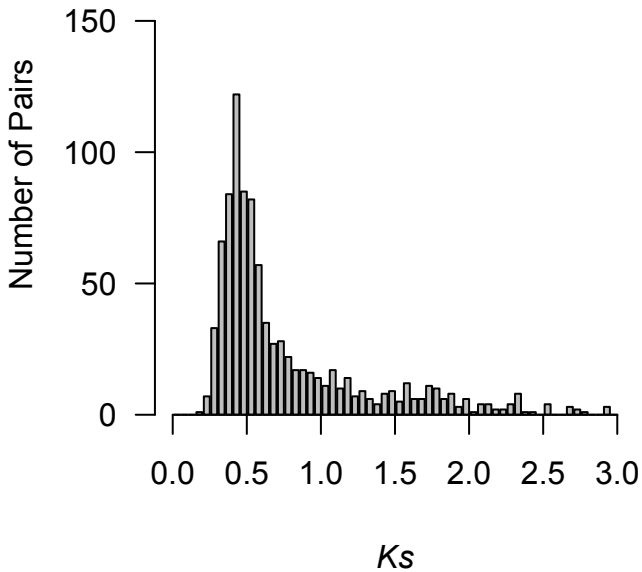

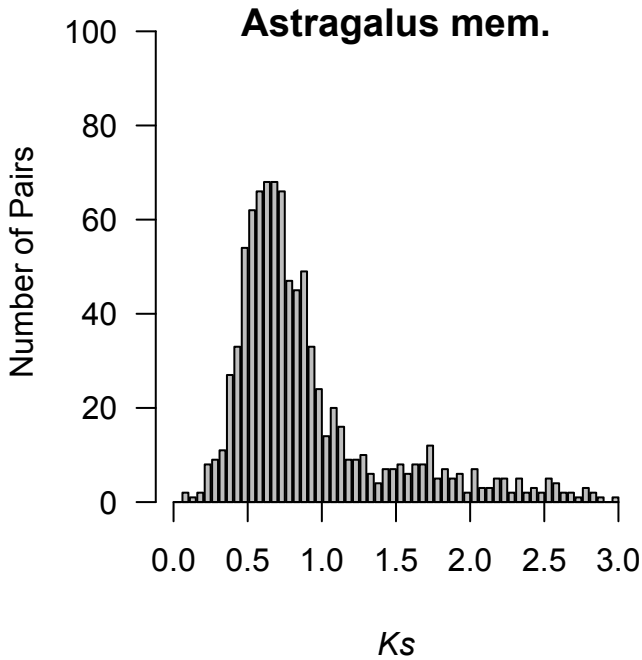

# Glycyrrhiza lepidota

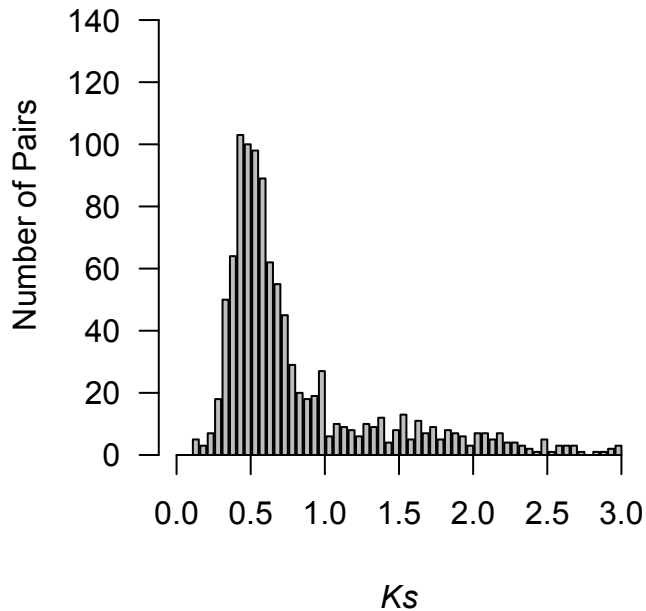

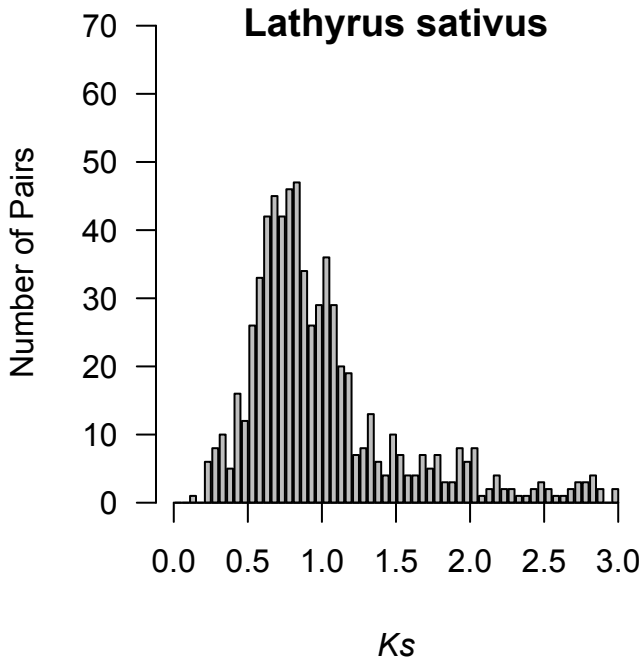



## ***Senna hebecarpa***

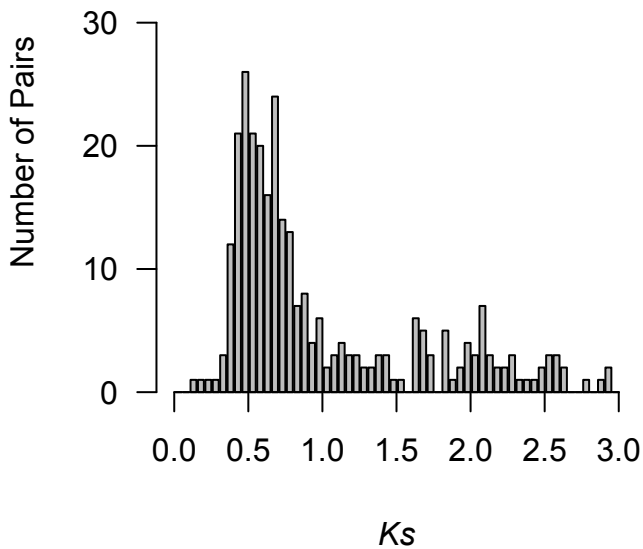

# Polygala lutea

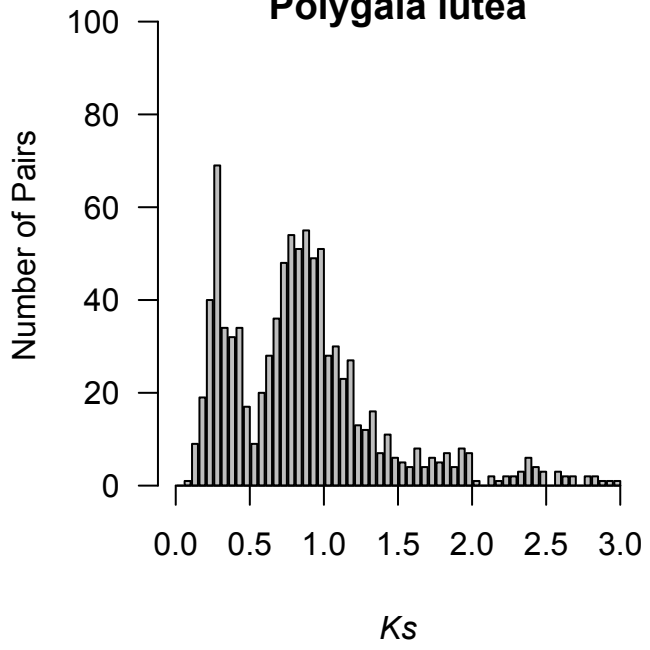

## Quillaja saponaria

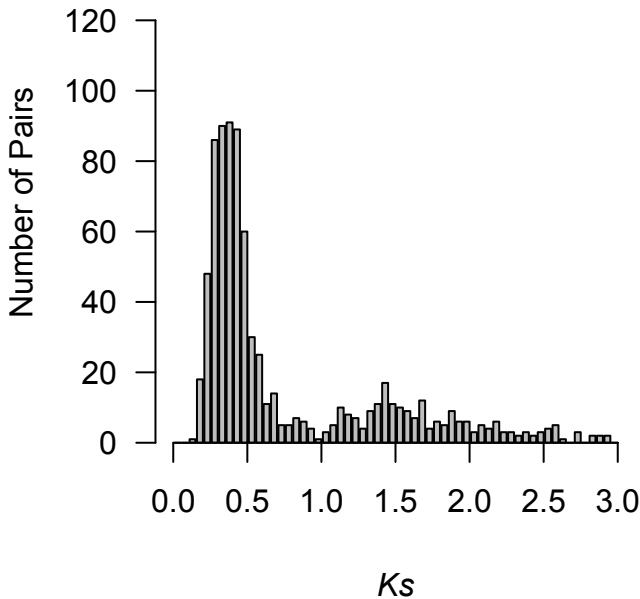

## *Glycyrrhiza glabra*

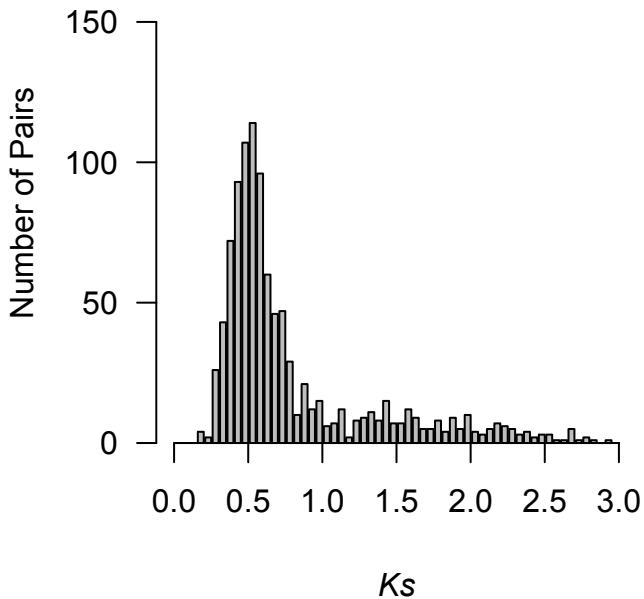

## Gymnocladus dioicus

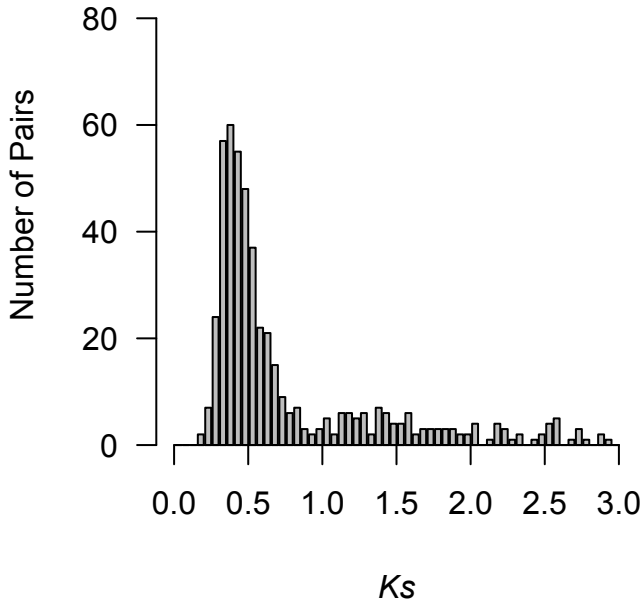

## **Cercis canadensis**

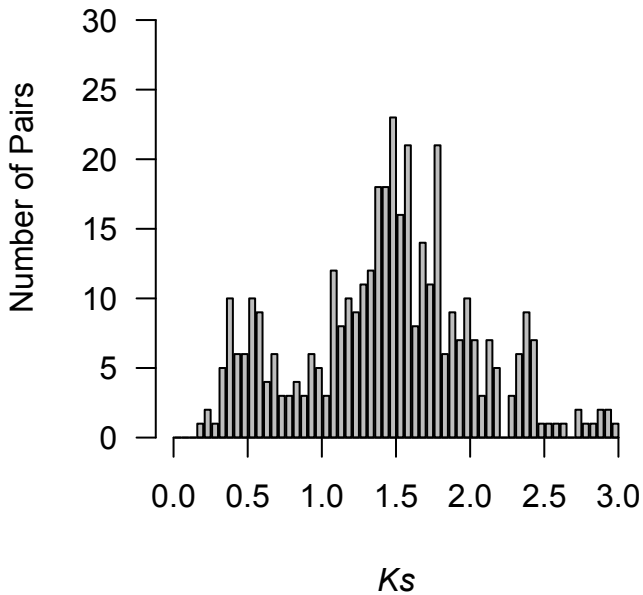

# Copaifera officinalis

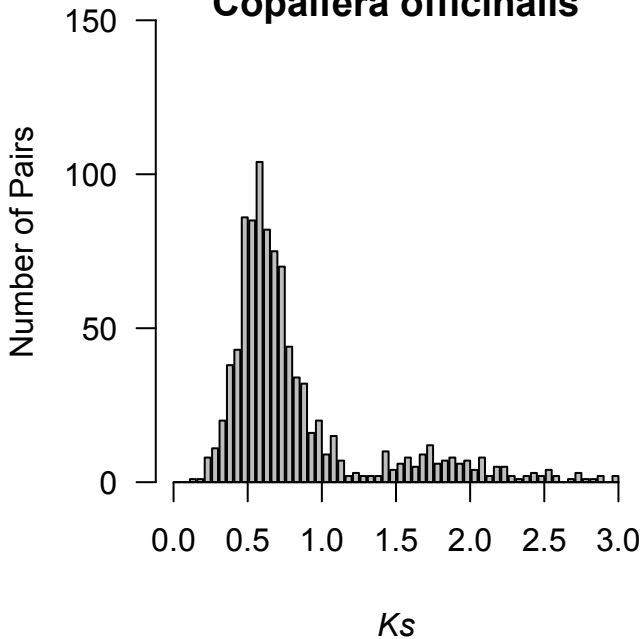

# Wisteria floribunda

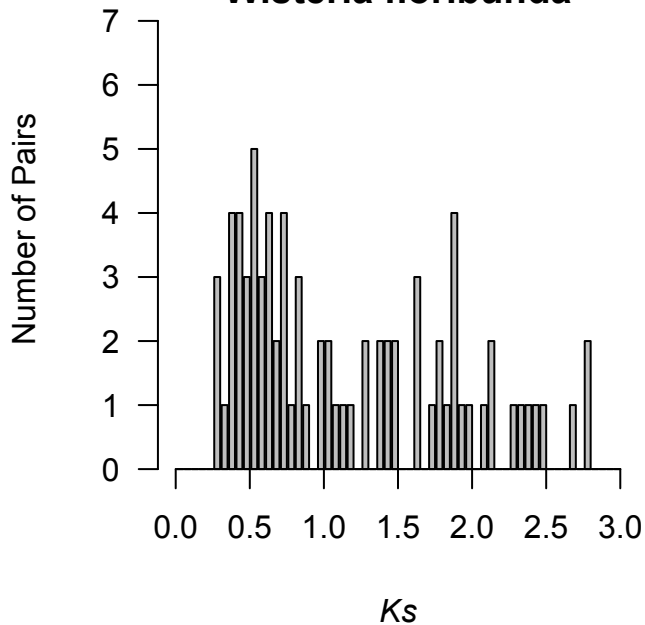



## Cladrastis lutea

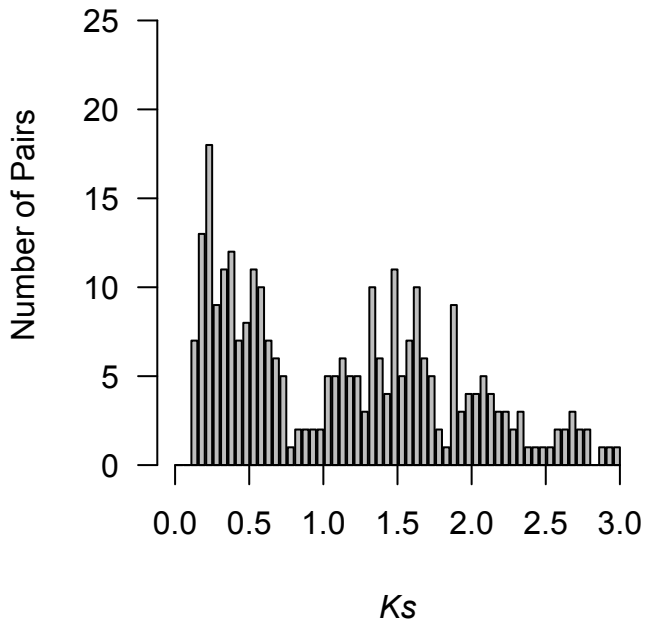

# Codariocalyx motorius

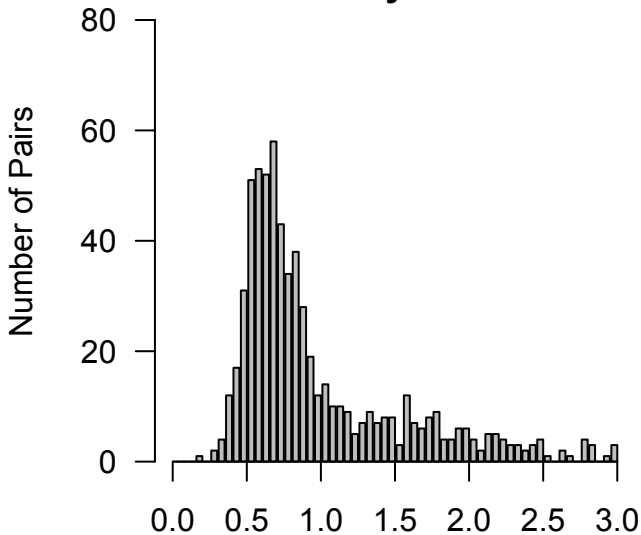

## Lupinus angustifolius

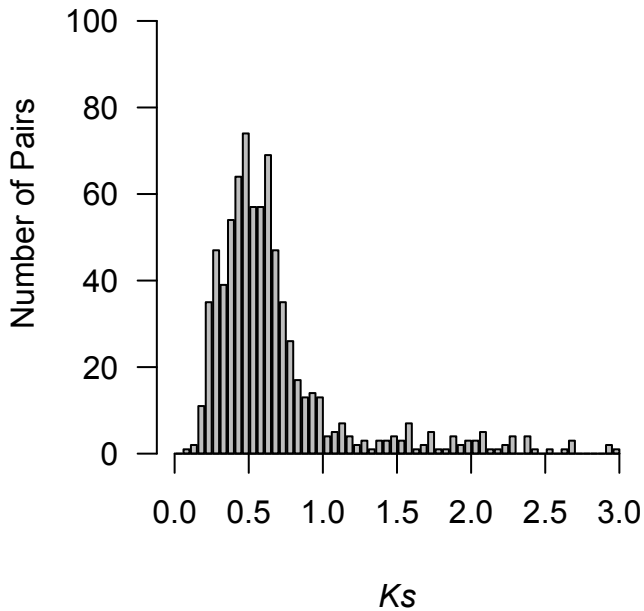

## Bituminaria bituminosa

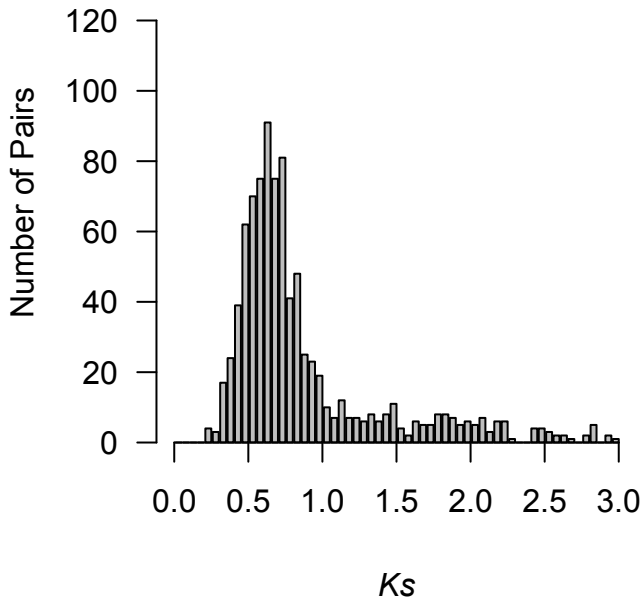

# Gompholobium polymorp

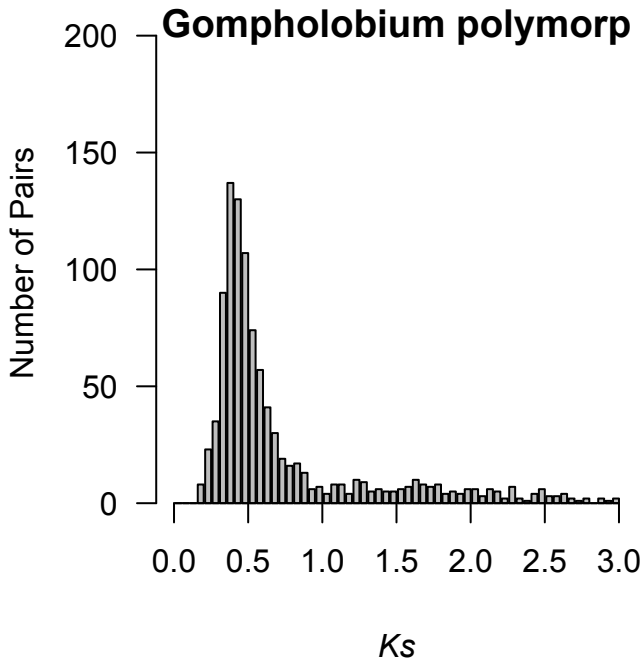

## Desmanthus illinoiensis

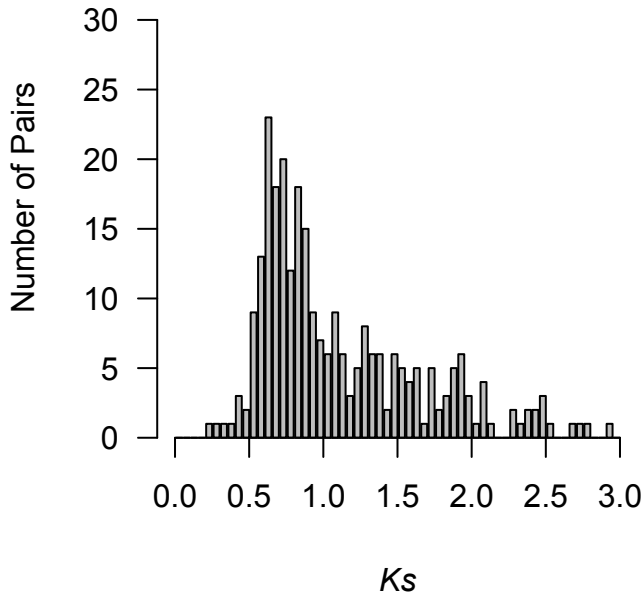

Supplement: supp_msu296_SupFile3_legumes_all_Ks.pdf [file supp_msu296_SupFile3_legumes_all_Ks.pdf]
