# Supplementary material
Source: PubMed Central journal article supplement (PMC4271530)

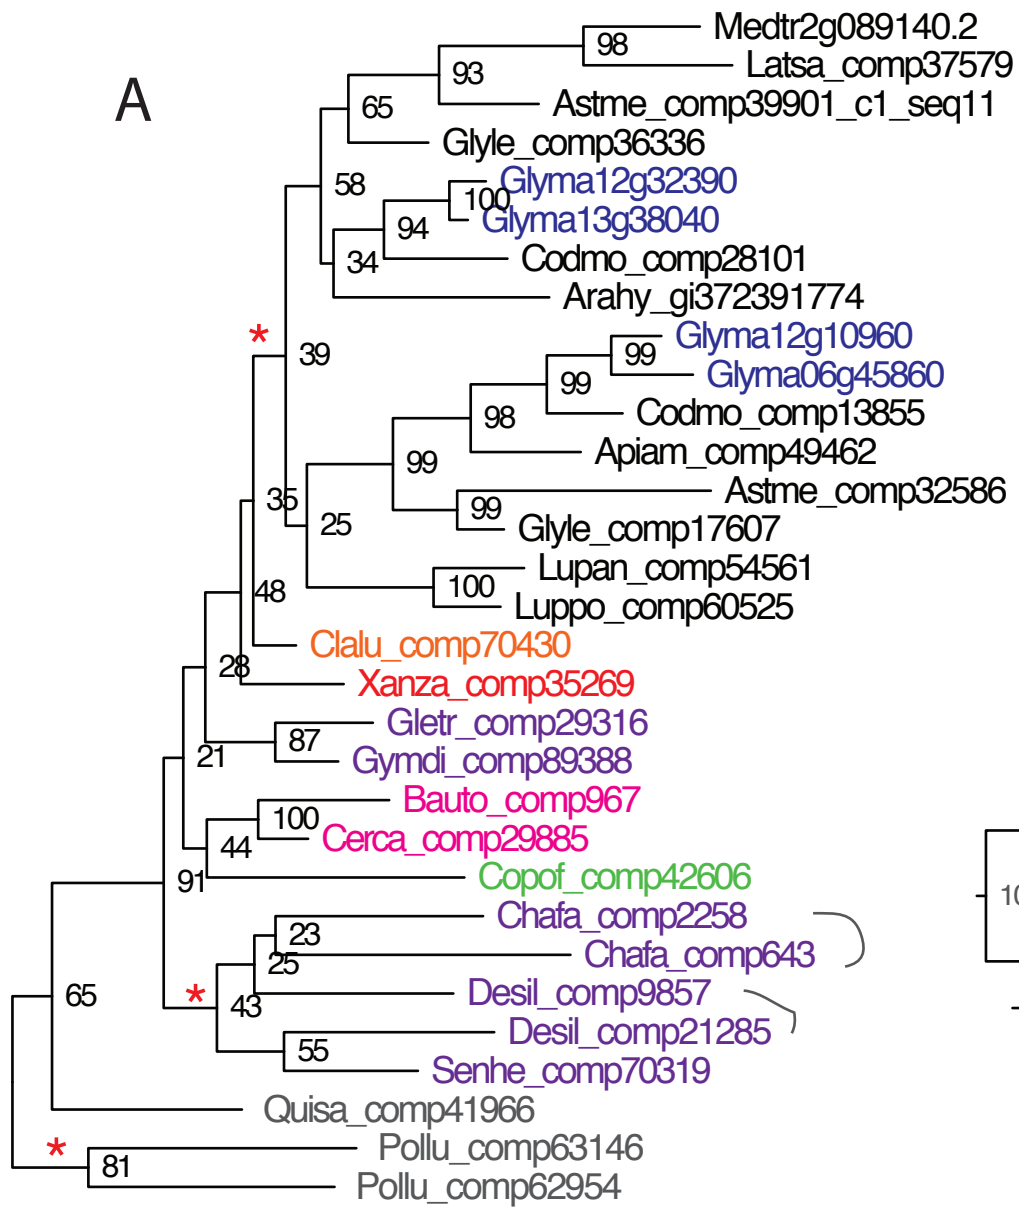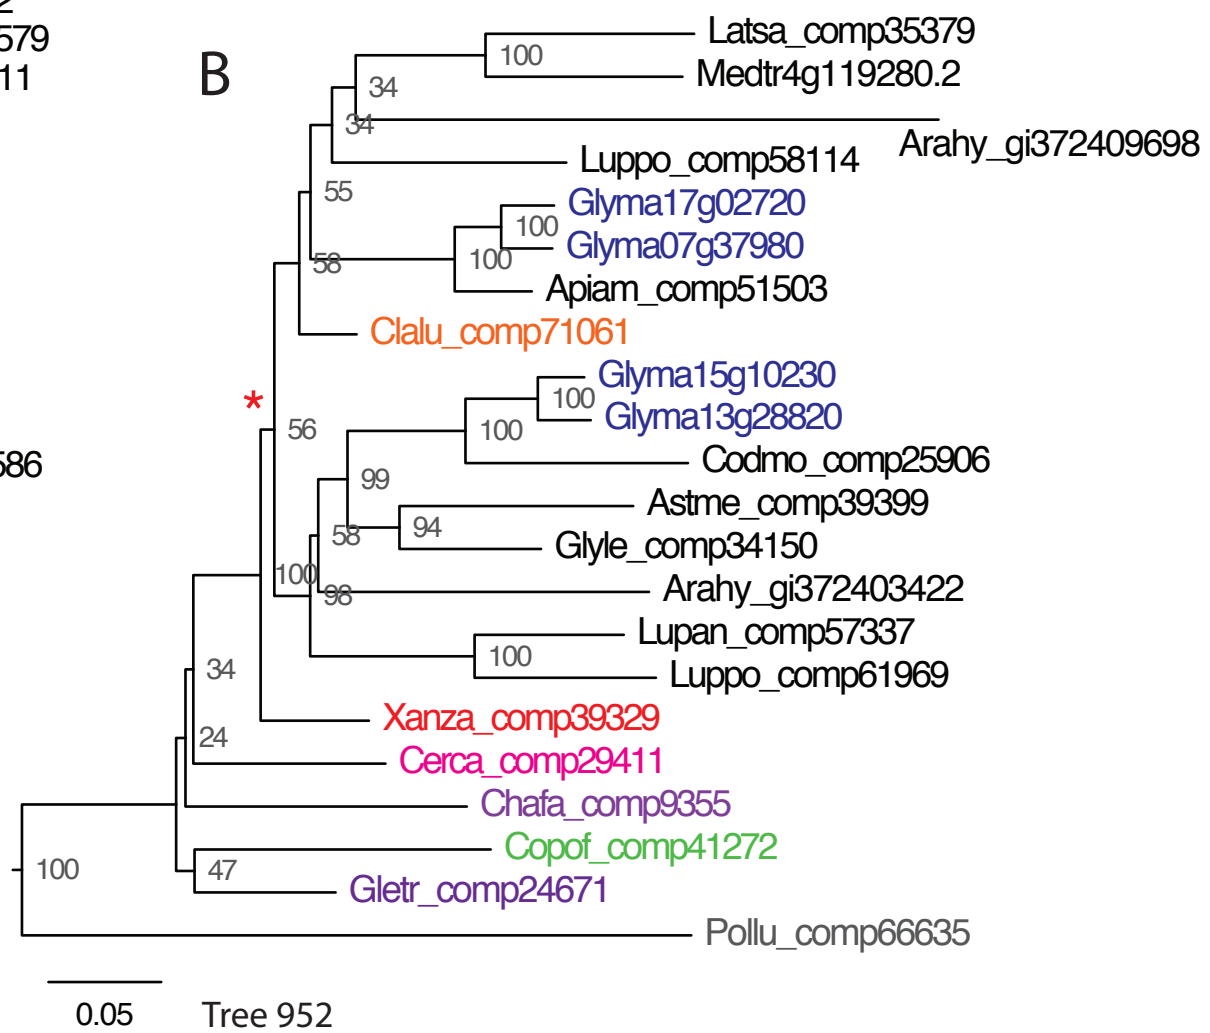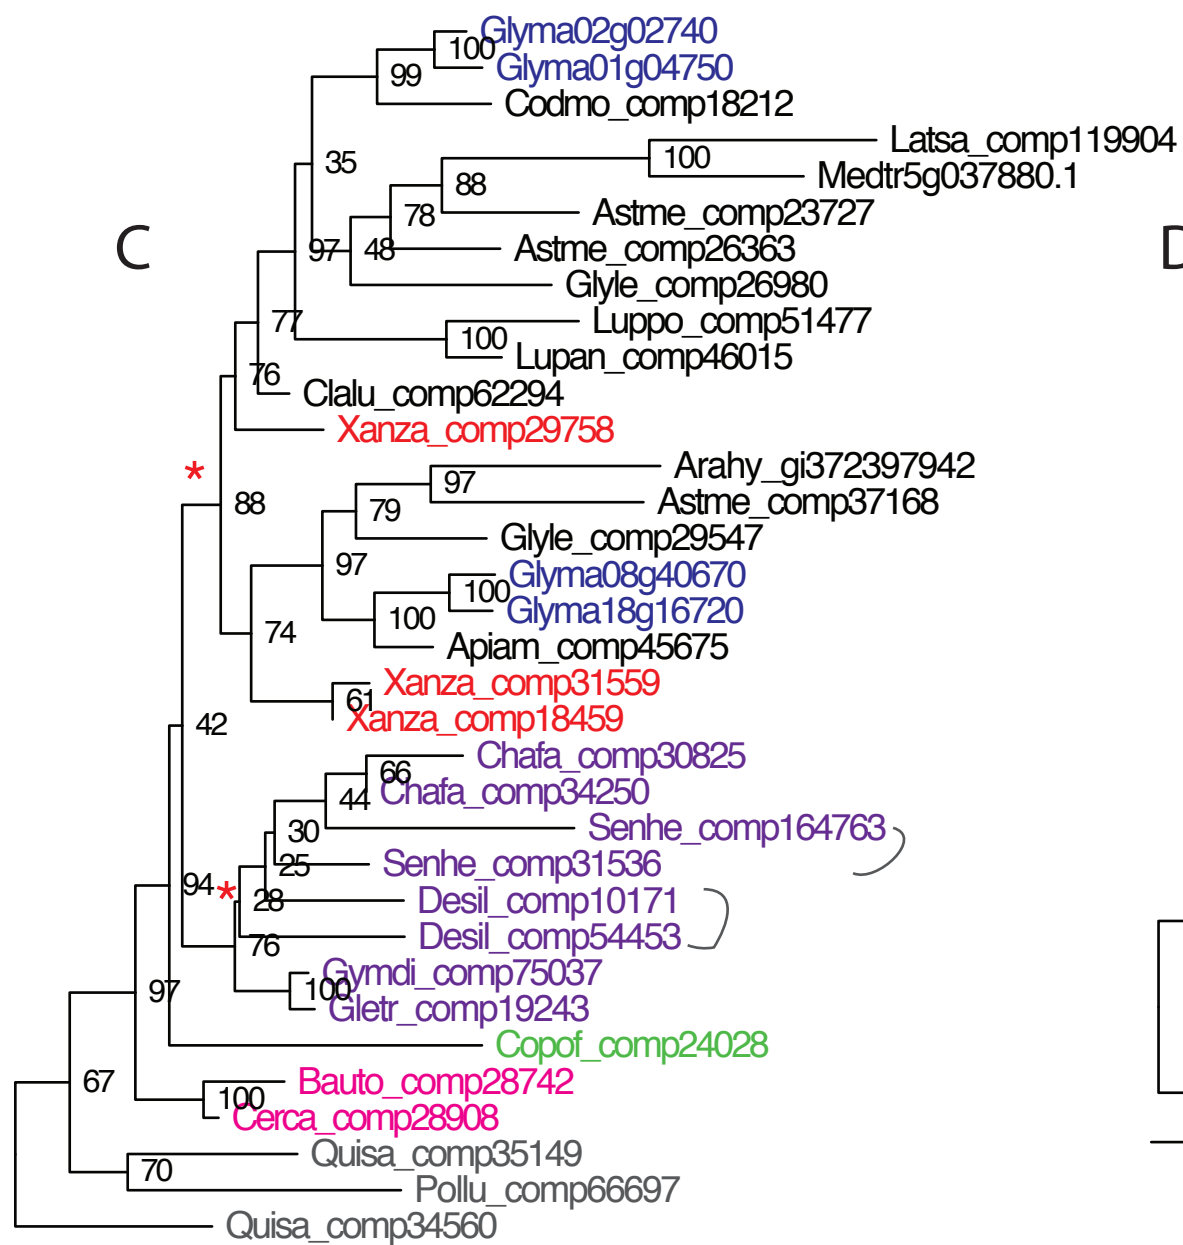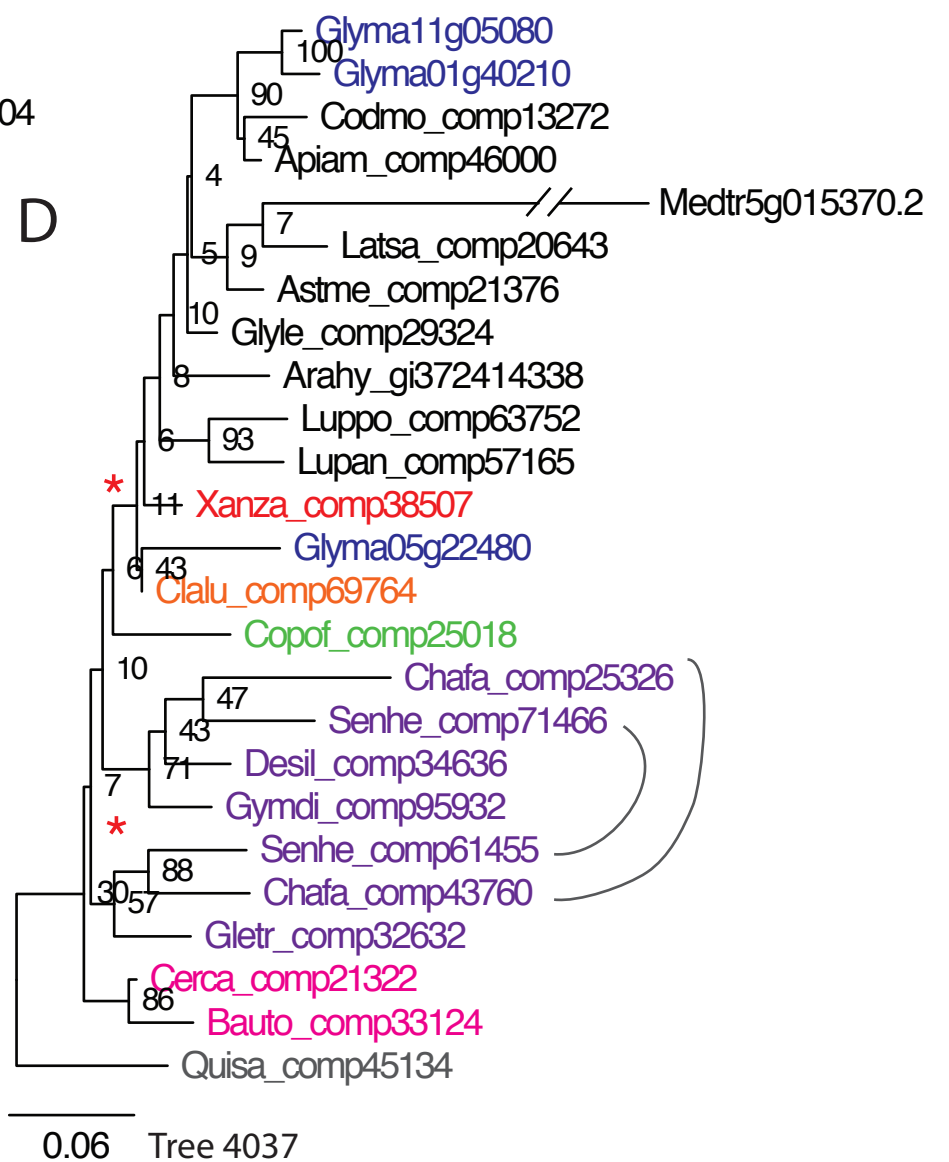

Supplement: supp_msu296_SupFile2_tree_examples.pdf [file supp_msu296_SupFile2_tree_examples.pdf]
